# Supplementary material for: Hidden Viral Sequences in Public Sequencing Data and Warning for Future Emerging Diseases
Source: PubMed Central journal article supplement (PMC8406186; doi:10.1128/mbio.01638-21), 2021-08-17

# Supplemental Figure 1

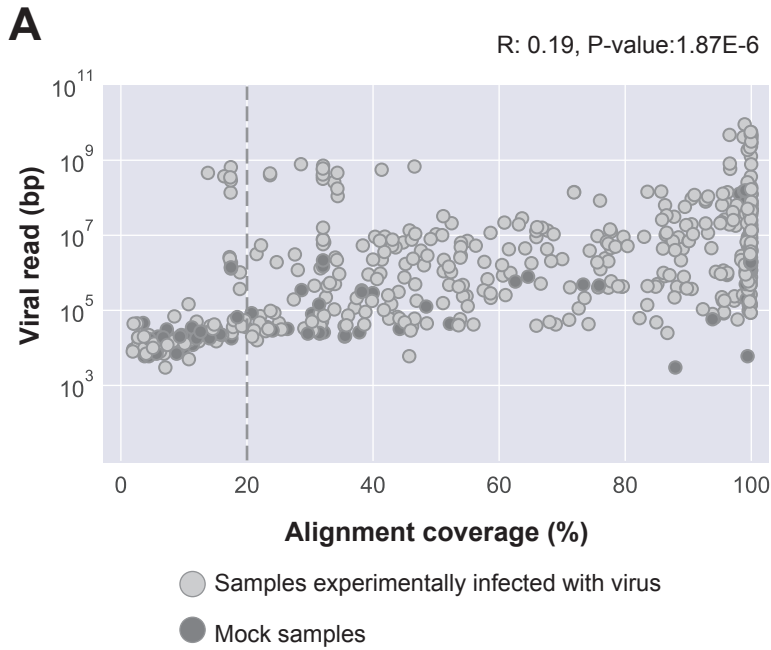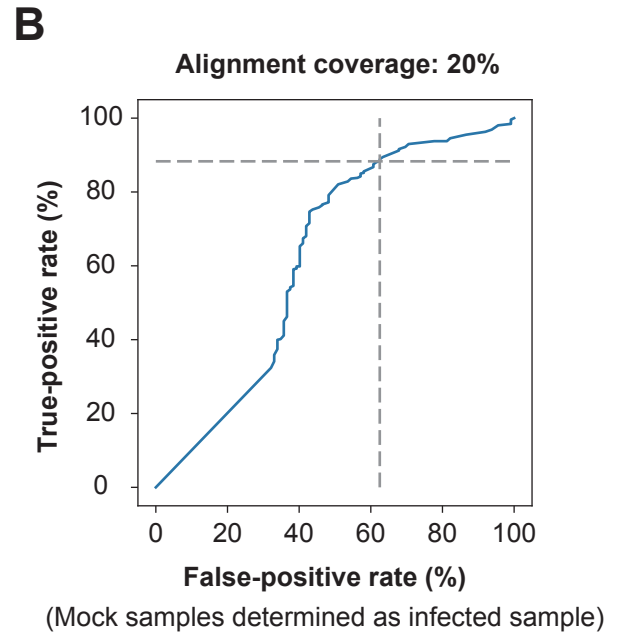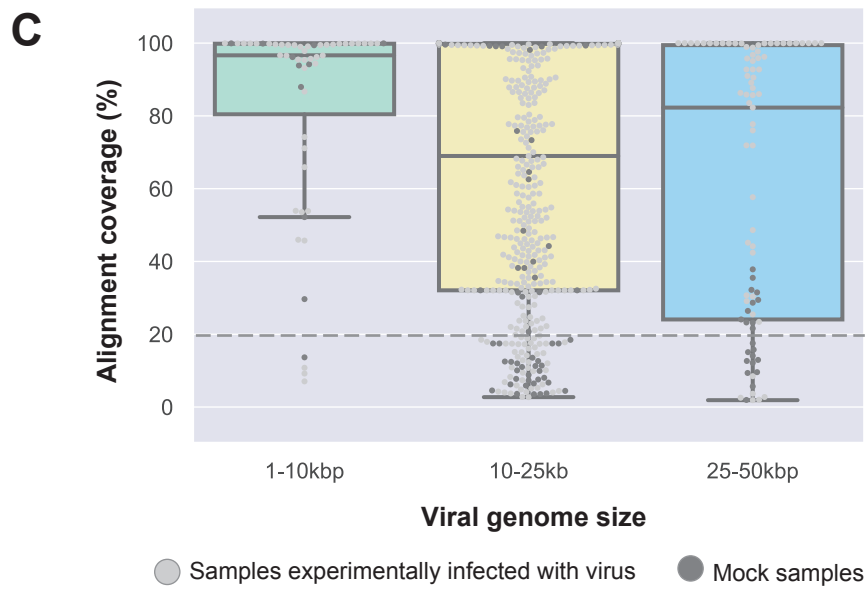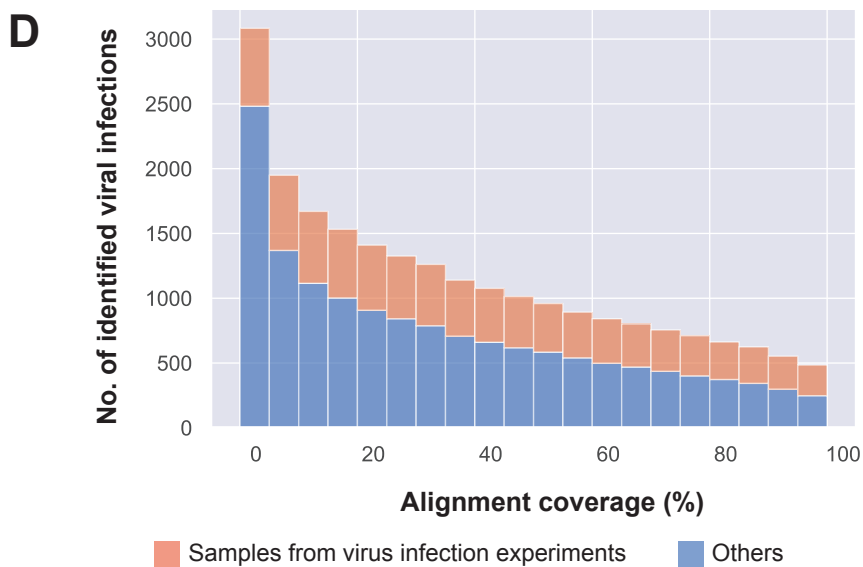

Supplement: mbio.01638-21-sf001.pdf [file mbio.01638-21-sf001.pdf]
